# Supplementary material for: Identification of Clinical Response Predictors of Tocilizumab Treatment in Patients with Severe COVID-19 Based on Single-Center Experience
Source: MDPI journal article supplement (doi:10.3390/jcm12062429), 2023-03-22
Supplement: s1 [file s1]

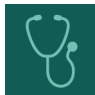

**Supplementary Table S3.** Extended clinical characteristics of study groups, presented as median (Q1-Q3). *P* values were derived with Mann-Whitney U test.

| Parameter<br>/time               | Group | temperature<br>(°C) | <i>P</i> value | SBP<br>(mmHg) | value | DBP<br>(mmHg) | <i>P</i> value |
|----------------------------------|-------|---------------------|----------------|---------------|-------|---------------|----------------|
| Baseline                         | CR    | 37.2 (36.7-38.3)    | 0.225          | 127 (120-146) | 0.366 | 80 (70-85)    | 0.003          |
|                                  | NR    | 36.9 (36.6-37.8)    |                | 125 (118-138) |       | 70 (63-80)    |                |
| On TCZ administration            | CR    | 36.8 (36.6-37.1)    | 0.610          | 124 (118-138) | 0.879 | 77 (70-82)    | 0.956          |
|                                  | NR    | 36.8 (36.6-37.1)    |                | 126 (119-137) |       | 74 (70-86)    |                |
| On 2 <sup>nd</sup> day after TCZ | CR    | 36.6 (36.5-36.7)    | 0.051          | 126 (115-140) | 0.342 | 77 (70-83)    | 0.858          |
|                                  | NR    | 36.7 (36.6-37.1)    |                | 131 (119-140) |       | 77 (70-85)    |                |
| On 5 <sup>th</sup> day after TZ  | CR    | 36.6 (36.5-36.8)    | 0.088          | 120 (114-133) | 0.970 | 77 (70-84)    | 0.015          |
|                                  | NR    | 36.8 (36.6-37.1)    |                | 121 (11-137)  |       | 72 (66-77)    |                |
| Last recorded                    | CR    | 36.6 (36.6-36.8)    | <0.001         | 125 (115-134) | 0.497 | 77 (70-85)    | 0.409          |
|                                  | NR    | 36.8 (36.6-37.1)    |                | 120 (115-134) |       | 76 (70-83)    |                |

  

| Parameter<br>/time               | Group | HR (/min)   | <i>P</i> value | RR<br>(/min) | <i>P</i> value | QO <sub>2</sub><br>(L/min) | <i>P</i> value |
|----------------------------------|-------|-------------|----------------|--------------|----------------|----------------------------|----------------|
| Baseline                         | CR    | 88 (78-100) | 0.035          | 18 (15-20)   | 0.040          | 6 (4-15)                   | <0.001         |
|                                  | NR    | 79 (74-90)  |                | 20 (16-25)   |                | 14 (6-15)                  |                |
| On TCZ administration            | CR    | 78 (71-90)  | 0.863          | 16 (14-20)   | <0.001         | 7.5 (5-15)                 | <0.001         |
|                                  | NR    | 79 (69-86)  |                | 21 (18-26)   |                | 15 (10-50)                 |                |
| On 2 <sup>nd</sup> day after TCZ | CR    | 70 (64-80)  | 0.051          | 14 (12-16)   | <0.001         | 5 (3-12)                   | <0.001         |
|                                  | NR    | 72 (65-84)  |                | 25 (16-27)   |                | 50 (15-60)                 |                |
| On 5 <sup>th</sup> day after TZ  | CR    | 74 (64-84)  | 0.322          | 13 (12-14)   | <0.001         | 2 (0-5)                    | <0.001         |
|                                  | NR    | 75 (67-89)  |                | 20 (17-22)   |                | 50(45-60)                  |                |
| Last recorded                    | CR    | 80 (70-90)  | 0.364          | 12 (12-13)   | <0.001         | 0 (0-0)                    | <0.001         |
|                                  | NR    | 82 (73-92)  |                | 20 (12-20)   |                | 50 (0-50)                  |                |

| Parameter<br>/time               | Group | MEWS             | P value | qSOFA            | value   | WHO<br>OS                          | P value |
|----------------------------------|-------|------------------|---------|------------------|---------|------------------------------------|---------|
| Baseline                         | CR    | 1 (1-2)          | 0.875   | 0 (0-1)          | 0.006   | 5 (5-5)                            | 0.106   |
|                                  | NR    | 1 (1-3)          |         | 1 (0-1)          |         | 5 (5-5)                            |         |
| On TCZ administration            | CR    | 1 (0-2)          | 0.008   | 0 (0-1)          | <0.001  | 5 (5-5)                            | 0.013   |
|                                  | NR    | 2 (1-2)          |         | 1 (0-1)          |         | 5 (5-6)                            |         |
| On 2 <sup>nd</sup> day after TCZ | CR    | 0 (0-1)          | <0.001  | 0 (0-0)          | <0.001  | 5 (5-5)                            | <0.001  |
|                                  | NR    | 2 (0-3)          |         | 1 (0-1)          |         | 6 (5-6)                            |         |
| On 5 <sup>th</sup> day after TZ  | CR    | 0 (0-0)          | <0.001  | 0 (0-0)          | <0.001  | 5 (4-5)                            | <0.001  |
|                                  | NR    | 2 (1-3)          |         | 1 (0-2)          |         | 6 (6-8)                            |         |
| Last recorded                    | CR    | 0 (0-0)          | <0.001  | 0 (0-0)          | <0.001  | 4 (4-4)                            | <0.001  |
|                                  | NR    | 3 (0-3)          |         | 2 (0-2)          |         | 8 (4-9)                            |         |
| Parameter<br>/time               | Group | ROX index        | P value | HR-ROX<br>index  | P value | SpO <sub>2</sub> /FiO <sub>2</sub> | P value |
| Baseline                         | CR    | 11.1 (6.1-17.2)  | 0.006   | 12.9 (7.2-19.5)  | 0.027   | 202 (121-251)                      | 0.007   |
|                                  | NR    | 6.5 (4.6-11.3)   |         | 7.2 (5.5-11.7)   |         | 121 (111-208)                      |         |
| On TCZ administration            | CR    | 10.9 (6.6-16.1)  | <0.001  | 14.4 (7.2-21.3)  | <0.001  | 179 (120-239)                      | <0.001  |
|                                  | NR    | 5.3 (4.0-7.7)    |         | 7.0 (4.8-11.3)   |         | 111 (102-152)                      |         |
| On 2 <sup>nd</sup> day after TCZ | CR    | 15.2 (9.7-21.7)  | <0.001  | 20.6 (12.9-32.2) | <0.001  | 227 (142-287)                      | <0.001  |
|                                  | NR    | 4.8 (3.6-7.9)    |         | 6.8 (4.6-12.1)   |         | 114 (99-122)                       |         |
| On 5 <sup>th</sup> day after TZ  | CR    | 24.1 (15.3-37.2) | <0.001  | 34.7 (19.6-47.8) | <0.001  | 324 (228-451)                      | <0.001  |
|                                  | NR    | 6.1 (4.9-7.0)    |         | 7.7 (6.0-9.8)    |         | 115 (101-130)                      |         |
| Last recorded                    | CR    | 37.9 (35.6-38.5) | <0.001  | 46.6 (39.8-54.1) | <0.001  | 457 (448-462)                      | <0.001  |
|                                  | NR    | 5.6 (4.8-36.6)   |         | 7.7 (5.3-42.1)   |         | 112 (103-448)                      |         |

CR – clinical responder, NR – non-responder, SBP – systolic blood pressure, DBP – diastolic blood pressure, HR - heart rate, RR – respiratory rate, QO<sub>2</sub> – oxygen flow, MEWS – Modified Early Warning Score, qSOFA - quick Sepsis Related Organ Failure Assessment score, WHO OS – World Health Organization Ordinal Scale, CT – computed tomography, FiO<sub>2</sub> – fraction of inspired oxygen, SpO<sub>2</sub> – peripheral oxygen saturation measured with pulse oximeter
