# Supplementary material for: Identification of Clinical Response Predictors of Tocilizumab Treatment in Patients with Severe COVID-19 Based on Single-Center Experience
Source: MDPI journal article supplement (doi:10.3390/jcm12062429), 2023-03-22
Supplement: s1 [file s1]

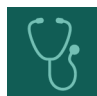

**Supplementary Table S2.** Full demographic and initial clinical characteristics of study group, presented as n (%), mean ( $\pm$ SD) or median (Q1–Q3).

| Characteristic                                    | Clinical responders | Non-responders     | P value            |
|---------------------------------------------------|---------------------|--------------------|--------------------|
| Patients                                          | 86 (71.7%)          | 34 (28.3%)         | -                  |
| Sex, male                                         | 59 (68.6%)          | 19 (55.9%)         | 0.188 <sup>a</sup> |
| Age (years)*                                      | 56.1 ( $\pm$ 13.2)  | 63.5 ( $\pm$ 12.5) | 0.006 <sup>b</sup> |
| Vaccinated against SARS-CoV-2                     | 3 (3.5%)            | 2 (5.9%)           | 0.438 <sup>d</sup> |
| SARS-CoV-2 reinfection                            | 1 (1.1%)            | 1 (2.9%)           | 0.488 <sup>d</sup> |
| Body Mass Index (kg/m <sup>2</sup> )              | 27.8 (24.7–32.3)    | 30.6 (26.1–33.2)   | 0.157 <sup>c</sup> |
| Charlson Comorbidity Index*                       | 2 (1–3)             | 3 (2–4)            | 0.004 <sup>c</sup> |
| Comorbidities:                                    |                     |                    |                    |
| obesity                                           | 32 (37.2%)          | 17 (50.0%)         | 0.199 <sup>a</sup> |
| arterial hypertension                             | 40 (46.5%)          | 19 (55.9%)         | 0.354 <sup>a</sup> |
| hyperlipidaemia                                   | 31 (36.0%)          | 17 (50.0%)         | 0.159 <sup>a</sup> |
| atrial fibrillation*                              | 5 (5.8%)            | 7 (20.6%)          | 0.024 <sup>d</sup> |
| chronic kidney disease                            | 4 (4.7%)            | 3 (8.8%)           | 0.313 <sup>d</sup> |
| chronic coronary syndrome*                        | 9 (10.5%)           | 10 (29.4%)         | 0.010 <sup>d</sup> |
| chronic heart failure                             | 3 (3.5%)            | 3 (8.8%)           | 0.22 <sup>d</sup>  |
| diabetes mellitus                                 | 19 (22.1%)          | 9 (26.5%)          | 0.609 <sup>a</sup> |
| connective tissue disorders                       | 7 (8.1%)            | 3 (8.8%)           | 0.578 <sup>d</sup> |
| inflammatory bowel disease                        | 2 (2.3%)            | -                  | 0.512 <sup>d</sup> |
| transplant recipients                             | 3 (3.5%)            | -                  | 0.364 <sup>d</sup> |
| asthma and/or COPD*                               | 4 (4.7%)            | 6 (17.7%)          | 0.029 <sup>d</sup> |
| active neoplastic disease                         | 3 (3.5%)            | 1 (2.9%)           | 0.682 <sup>d</sup> |
| chronic hepatic disorder                          | 1 (1.1%)            | 1 (2.9%)           | 0.488 <sup>d</sup> |
| Time from symptoms onset to admission (days)      | 11 (8–12)           | 9 (8–13)           | 0.315 <sup>c</sup> |
| Time from dyspnoea onset to admission (days)      | 2 (0–4)             | 2 (1–4)            | 0.136 <sup>c</sup> |
| Duration of hospitalization (days)                | 13 (11–17)          | 14 (10–22)         | 0.553 <sup>c</sup> |
| Day of 1 <sup>st</sup> dose of TCZ administration | 2 (2–3)             | 2 (2–3)            | 0.964 <sup>c</sup> |
| day 1.                                            | 4 (4.7%)            | 2 (5.9%)           | -                  |
| day 2.                                            | 50 (58.1%)          | 19 (55.9%)         | -                  |
| day 3.                                            | 15 (17.4%)          | 6 (17.7%)          | -                  |
| day 4.                                            | 8 (9.3%)            | 3 (8.8%)           | -                  |
| after day 4.                                      | 9 (10.5%)           | 4 (11.7%)          | -                  |
| Time from symptoms onset to TCZ (days)            | 12 (9–13)           | 10 (9–14)          | 0.337 <sup>c</sup> |
| Time from dyspnoea onset to TCZ (days)            | 3 (2–6)             | 4.5 (3–7)          | 0.086 <sup>c</sup> |
| Symptoms on admission                             |                     |                    |                    |
| cough                                             | 64 (74.4%)          | 23 (67.6%)         | 0.454 <sup>a</sup> |

|                                                       |               |               |                     |
|-------------------------------------------------------|---------------|---------------|---------------------|
| subfebrile (37.5-38.3°C)                              | 13 (15.1%)    | 2 (5.9%)      | 0.140 <sup>d</sup>  |
| fever (38.3-39.3°C)                                   | 65 (75.6%)    | 23 (67.7%)    | 0.376 <sup>a</sup>  |
| hyperpyrexia (>39.3°C)                                | 6 (7.0%)      | 2 (5.9%)      | 0.594 <sup>d</sup>  |
| dyspnoea at rest                                      | 47 (54.7%)    | 22 (64.7%)    | 0.315 <sup>a</sup>  |
| exertional dyspnoea only                              | 19 (22.1%)    | 6 (17.7%)     | 0.589 <sup>a</sup>  |
| hypoxemia without dyspnoea                            | 20 (23.3%)    | 6 (17.7%)     | 0.501 <sup>a</sup>  |
| malaise                                               | 44 (51.2%)    | 12 (35.3%)    | 0.116 <sup>a</sup>  |
| chest pain                                            | 7 (8.1%)      | 5 (14.7%)     | 0.224 <sup>d</sup>  |
| hemoptysis                                            | 2 (2.3%)      | 1 (2.9%)      | 0.636 <sup>d</sup>  |
| abdominal pain                                        | 4 (4.7%)      | 1 (2.9%)      | 0.562 <sup>d</sup>  |
| nausea                                                | 23 (26.7%)    | 7 (20.6%)     | 0.483 <sup>a</sup>  |
| vomiting                                              | 4 (4.7%)      | 2 (5.9%)      | 0.547 <sup>d</sup>  |
| diarrhoea                                             | 9 (10.5%)     | 4 (11.7%)     | 0.532 <sup>d</sup>  |
| headache                                              | 14 (16.3%)    | 5 (14.7%)     | 0.831 <sup>a</sup>  |
| myalgia                                               | 21 (24.4%)    | 9 (26.5%)     | 0.815 <sup>a</sup>  |
| arthralgia                                            | 5 (5.8%)      | 2 (5.9%)      | 0.640 <sup>d</sup>  |
| pharyngitis                                           | 2 (2.23%)     | 2 (5.9%)      | 0.318 <sup>d</sup>  |
| catarrh                                               | 14 (16.3%)    | 6 (17.7%)     | 0.856 <sup>a</sup>  |
| dysgeusia                                             | 16 (18.6%)    | 6 (17.7%)     | 0.902 <sup>a</sup>  |
| ageusia                                               | 9 (10.5%)     | 4 (11.8%)     | 0.532 <sup>d</sup>  |
| hypo- and anosmia                                     | 11 (12.8%)    | 2 (5.9%)      | 0.226 <sup>d</sup>  |
| Mental status (ACDU)                                  |               |               |                     |
| A (Alert)                                             | 85 (98.8%)    | 32 (94.1%)    | 0.193 <sup>b</sup>  |
| C (Confused)                                          | 1 (1.2%)      | 2 (5.9%)      |                     |
| Lung parenchyma involvement in CT (%)*                | 50 (35-60)    | 70 (60-85)    | <0.001 <sup>c</sup> |
| COVID-RRS*                                            | 5.0 (4.0-6.0) | 7.3 (5.6-8.5) | <0.001 <sup>c</sup> |
| Baseline PaO <sub>2</sub> /FiO <sub>2</sub> *         | 203 (136-277) | 106 (80-177)  | <0.001 <sup>c</sup> |
| SpO <sub>2</sub> /FiO <sub>2</sub> on TCZ initiation* | 179 (120-239) | 111 (102-152) | <0.001 <sup>c</sup> |
| WHO clinical progression scale on TCZ initiation*     |               |               |                     |
| 5                                                     | 75 (87.2%)    | 23 (67.6%)    | 0.013 <sup>a</sup>  |
| 6                                                     | 11 (12.7%)    | 11 (32.4%)    |                     |
| Concomitant treatment:                                |               |               |                     |
| intravenous dexamethasone                             | 86 (100%)     | 34 (100%)     | -                   |
| remdesivir                                            | 71 (82.6%)    | 27 (79.4%)    | 0.688 <sup>a</sup>  |
| convalescent plasma                                   | 61 (70.9%)    | 24 (70.5%)    | 0.970 <sup>a</sup>  |
| antibiotics                                           | 25 (29.1%)    | 14 (41.2%)    | 0.212 <sup>a</sup>  |
| LMWH                                                  | 84 (97.7%)    | 32 (94.1%)    | 0.318 <sup>d</sup>  |
| prophylactic dose                                     | 38 (44.2%)    | 15 (44.1%)    | 0.994 <sup>a</sup>  |
| moderate dose                                         | 42 (48.8%)    | 16 (47.1%)    | 0.860 <sup>a</sup>  |
| therapeutic dose                                      | 4 (4.7%)      | 1 (2.9%)      | 0.562 <sup>d</sup>  |
| NOACs                                                 | 4 (4.7%)      | 1 (2.9%)      | 0.562 <sup>d</sup>  |

|                                  |            |            |                    |
|----------------------------------|------------|------------|--------------------|
| ASA                              | 3 (3.5%)   | 3 (8.8%)   | 0.438 <sup>d</sup> |
| P <sub>2</sub> Y <sub>12</sub> i | 1 (1.2%)   | -          | 0.717 <sup>d</sup> |
| ACEI                             | 24 (27.9%) | 10 (29.4%) | 0.869 <sup>a</sup> |
| ARB                              | 13 (15.1%) | 7 (20.6%)  | 0.469 <sup>a</sup> |
| CCB                              | 20 (23.3%) | 13 (38.2%) | 0.097 <sup>a</sup> |
| β-blockers                       | 19 (22.1%) | 12 (35.3%) | 0.136 <sup>a</sup> |
| diuretics                        | 18 (20.9%) | 10 (29.4%) | 0.322 <sup>a</sup> |
| flozins                          | 3 (3.5%)   | 2 (5.9%)   | 0.438 <sup>d</sup> |
| insulin                          | 6 (7.0%)   | 3 (8.8%)   | 0.495 <sup>d</sup> |
| GLP-1 agonists                   | 2 (2.3%)   | 1 (2.9%)   | 0.636 <sup>d</sup> |
| metformin                        | 16 (18.6%) | 7 (20.6%)  | 0.804 <sup>a</sup> |
| DPP-4 inhibitors                 | 1 (1.2%)   | -          | 0.534 <sup>d</sup> |
| sulfonylureas                    | 5 (5.8%)   | 3 (8.8%)   | 0.406 <sup>d</sup> |
| statins                          | 28 (32.6%) | 13 (38.2%) | 0.555 <sup>a</sup> |
| IS treatment                     | 4 (4.7%)   | 1 (2.9%)   | 0.562 <sup>d</sup> |
| DMARDs treatment                 | 5 (5.8%)   | 2 (5.9%)   | 0.641 <sup>d</sup> |

\*p<0,05 – <sup>a</sup>χ<sup>2</sup> test, <sup>b</sup>t-Student test, <sup>c</sup>Mann-Whitney U test or <sup>d</sup>Fisher's exact test, as appropriate COPD – chronic obstructive pulmonary disease, TCZ – tocilizumab, ACDU – mental status score (Alert, Confused, Drowsy, Unresponsive), CT – computed tomography, PaO<sub>2</sub> – partial pressure of arterial oxygen, FiO<sub>2</sub> – fraction of inspired oxygen, SpO<sub>2</sub> – peripheral oxygen saturation measured with pulse oximeter, WHO – World Health Organization, LMWH – low molecular weight heparin, NOACs – novel oral anticoagulants, ASA – acetylsalicylic acid, P<sub>2</sub>Y<sub>12</sub>i – P<sub>2</sub>Y<sub>12</sub> inhibitors, ACEI – angiotensin converting enzyme inhibitors, ARB – angiotensin II receptor blockers, CCB – calcium channel blockers, GLP-1 – glucagon-like peptide 1, DPP-4 – dipeptidyl peptidase-4, IS – immunosuppressive, DMARDs – disease-modifying antirheumatic drugs
