# Supplementary material for: Identification of Clinical Response Predictors of Tocilizumab Treatment in Patients with Severe COVID-19 Based on Single-Center Experience
Source: MDPI journal article supplement (doi:10.3390/jcm12062429), 2023-03-22
Supplement: s1 [file s1]

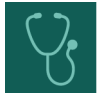

**Supplementary Table S4.** Extended laboratory characteristics of studied groups and outcomes, presented as median (Q1-Q3). *P* values were derived with Mann-Whitney U test.

| Parameter<br>/time               | Group | PaO <sub>2</sub> (mmHg) | <i>P</i> value | PaO <sub>2</sub><br>/FiO <sub>2</sub> | <i>P</i> value | Hgb<br>(mmol/L) | <i>P</i> value |
|----------------------------------|-------|-------------------------|----------------|---------------------------------------|----------------|-----------------|----------------|
| Baseline                         | CR    | 87 (73-1310)            | <0.001         | 203 (126-277)                         | <0.001         | 8.5 (7.8-9.0)   | 0.213          |
|                                  | NR    | 64 (61-78)              |                | 106 (78-177)                          |                | 8.0 (7.6-9.0)   |                |
| On TCZ administration            | CR    | -                       | -              | -                                     | -              | 8.3 (7.8-8.9)   | 0.546          |
|                                  | NR    | -                       |                | -                                     |                | 8.2 (7.6-8.8)   |                |
| On 2 <sup>nd</sup> day after TCZ | CR    | -                       | -              | -                                     | -              | 8.3 (7.6-8.9)   | 0.813          |
|                                  | NR    | -                       |                | -                                     |                | 8.4 (7.6-9.1)   |                |
| On 5 <sup>th</sup> day after TCZ | CR    | -                       | -              | -                                     | -              | 8.8 (7.9-9.4)   | 0.610          |
|                                  | NR    | -                       |                | -                                     |                | 8.8 (7.9-9.6)   |                |
| Last recorded                    | CR    | -                       | -              | -                                     | -              | 8.8 (8.1-9.5)   | 0.098          |
|                                  | NR    | -                       |                | -                                     |                | 8.5 (7.4-9.2)   |                |

  

| Parameter<br>/time               | Group | RBC<br>(G/L)  | <i>P</i> value | Hct (%)          | <i>P</i> value | WBC (G/L)       | <i>P</i> value |
|----------------------------------|-------|---------------|----------------|------------------|----------------|-----------------|----------------|
| Baseline                         | CR    | 4.7 (4.3-5.1) | 0.347          | 39.9 (36.7-42.4) | 0.142          | 6.6 (5.2-8.3)   | 0.720          |
|                                  | NR    | 4.5 (4.1-4.9) |                | 37.8 (36.1-41.5) |                | 6.3 (4.7-9.5)   |                |
| On TCZ<br>administration         | CR    | 4.5 (4.2-5.0) | 0.720          | 39.3 (36.8-42.6) | 0.566          | 5.5 (5.0-7.6)   | 0.006          |
|                                  | NR    | 4.4 (4.1-4.9) |                | 38.7 (35.5-42.0) |                | 7.4 (5.5-9.8)   |                |
| On 2 <sup>nd</sup> day after TCZ | CR    | 4.5 (4.2-4.9) | 0.416          | 39.2 (36.0-42.4) | 0.495          | 6.0 (4.2-7.9)   | <0.001         |
|                                  | NR    | 4.6 (4.1-5.0) |                | 40.1 (36.0-42.9) |                | 7.8 (7.0-11.2)  |                |
| On 5 <sup>th</sup> day after TCZ | CR    | 4.8 (4.3-5.1) | 0.275          | 41.3 (37.0-44.0) | 0.643          | 7.1 (5.4-8.4)   | <0.001         |
|                                  | NR    | 4.9 (4.4-5.3) |                | 41.3 (37.4-45.1) |                | 12.2 (9.4-15.8) |                |
| Last recorded                    | CR    | 4.8 (4.3-5.3) | 0.322          | 41.7 (37.8-45.7) | 0.322          | 6.6 (4.9-9.7)   | <0.001         |
|                                  | NR    | 4.7 (4.1-5.2) |                | 40.2 (36.7-44.3) |                | 11.8 (6.5-30.9) |                |

| Parameter<br>/time               | Group | Neutrocytes<br>(G/L) | P value | Monocytes<br>(G/L) | P value | Lymphocytes<br>(G/L) | P value |
|----------------------------------|-------|----------------------|---------|--------------------|---------|----------------------|---------|
| Baseline                         | CR    | 5.1 (3.8-6.3)        | 0.426   | 0.4 (0.2-0.5)      | 0.350   | 0.7 (0.5-0.9)        | 0.517   |
|                                  | NR    | 5.3 (3.4-8.7)        |         | 0.3 (0.2-0.5)      |         | 0.8 (0.5-0.9)        |         |
| On TCZ administration            | CR    | 4.2 (3.0-5.8)        | 0.003   | 0.3 (0.2-0.4)      | 0.388   | 0.8 (0.6-1.1)        | 0.951   |
|                                  | NR    | 5.9 (4.4-8.0)        |         | 0.4 (0.2-0.6)      |         | 0.8 (0.6-1.0)        |         |
| On 2 <sup>nd</sup> day after TCZ | CR    | 4.2 (2.8-5.7)        | <0.001  | 0.4 (0.3-0.7)      | 0.286   | 1.1 (0.8-1.4)        | 0.023   |
|                                  | NR    | 6.3 (5.4-8.8)        |         | 0.4 (0.2-0.6)      |         | 0.9 (0.6-1.1)        |         |
| On 5 <sup>th</sup> day after TCZ | CR    | 4.6 (3.4-6.5)        | <0.001  | 0.6 (0.5-0.8)      | 0.053   | 1.5 (1.1-2.2)        | <0.001  |
|                                  | NR    | 9.5 (6.4-13.0)       |         | 0.5 (0.4-0.7)      |         | 0.9 (0/6-1.3)        |         |
| Last recorded                    | CR    | 4.1 (2.6-6.5)        | <0.001  | 0.7 (0.5-0.9)      | 0.018   | 1.7 (1.2-2.5)        | <0.001  |
|                                  | NR    | 9.3 (4.6-17.3)       |         | 0.6 (0.4-0.8)      |         | 1.2 (0.6-1.7)        |         |

| Parameter<br>/time               | Group | NLR            | P value | NMR              | P value | PLT (G/L)     | P value |
|----------------------------------|-------|----------------|---------|------------------|---------|---------------|---------|
| Baseline                         | CR    | 6.0 (5.0-10.3) | 0.764   | 14.2 (9.5-21.2)  | 0.235   | 204 (150-274) | 0.939   |
|                                  | NR    | 7.4 (4.7-10.8) |         | 16.9 (10.9-31.2) |         | 201 (166-254) |         |
| On TCZ administration            | CR    | 5.0 (3.2-9.4)  | 0.069   | 14.0 (7.9-21.9)  | 0.287   | 237 (177-300) | 0.791   |
|                                  | NR    | 7.0 93.8-11.9) |         | 15.0 (11.1-20.4) |         | 224 (198-293) |         |
| On 2 <sup>nd</sup> day after TCZ | CR    | 3.7 (2.3-5.5)  | <0.001  | 8.9 (6.3-12.9)   | <0.001  | 305 (221-368) | 0.278   |
|                                  | NR    | 7.6 (4.2-13.5) |         | 16.3 (10.6-24.2) |         | 275 (211-317) |         |
| On 5 <sup>th</sup> day after TCZ | CR    | 3.1 (1.9-5.4)  | <0.001  | 7.3 (5.4-10.3)   | <0.001  | 343 (256-394) | 0.007   |
|                                  | NR    | 9.8 (6.2-19.7) |         | 17.6 (11.5-32.1) |         | 269 (184-350) |         |
| Last recorded                    | CR    | 2.3 (1.3-3.9)  | <0.001  | 5.5 (3.2-8.0)    | <0.001  | 312 (252-381) | <0.001  |
|                                  | NR    | 9.9 (3-24.1)   |         | 14.9 (6.9-32.0)  |         | 209 (151-297) |         |

| Parameter<br>/time               | Group | INC (G/L)        | P value | CRP (mg/L)         | P value | Natremia<br>(mmol/L) | P value |
|----------------------------------|-------|------------------|---------|--------------------|---------|----------------------|---------|
| Baseline                         | CR    | 0.04 (0.02-0.06) | 0.426   | 118.5 (66.7-165.7) | 0.809   | 138 (135-139)        | 0.107   |
|                                  | NR    | 0.04 (0.02-0.06) |         | 129.8 (62.4-189.5) |         | 136 (132-139)        |         |
| On TCZ administration            | CR    | 0.04 (0.02-0.07) | 0.051   | 111.9 (66.1-185.6) | 0.643   | 139 (137-141)        | 0.465   |
|                                  | NR    | 0.06 (0.04-0.10) |         | 101.2 (64.3-166)   |         | 139 (137-141)        |         |
| On 2 <sup>nd</sup> day after TCZ | CR    | 0.05 (0.03-0.12) | 0.002   | 46.0 (21.7-83.9)   | 0.428   | 140 (139-142)        | 0.771   |
|                                  | NR    | 0.12 (0.05-0.33) |         | 41.7 (20.0-59.6)   |         | 141 (138-143)        |         |
| On 5 <sup>th</sup> day after TCZ | CR    | 0.06 (0.03-0.14) | 0.007   | 9.6 (4.6-19.8)     | 0.775   | 139 (137-142)        | 0.853   |
|                                  | NR    | 0.14 (0.05-0.29) |         | 8.7 (4.5-23.7)     |         | 139 (139-141)        |         |
| Last recorded                    | CR    | 0.07 (0.02-0.17) | <0.001  | 2.9 (1.1-5.5)      | 0.004   | 139 (137-141)        | <0.001  |
|                                  | NR    | 0.28 (0.06-0.86) |         | 8.1 (1.0-71.9)     |         | 142 (139-146)        |         |

| Parameter<br>/time               | Group | Kaliemia<br>(mmol/L) | P value | SCr (µmol/L) | P value | BUN<br>(mg/dL)   | P value |
|----------------------------------|-------|----------------------|---------|--------------|---------|------------------|---------|
| Baseline                         | CR    | 4.1 (3.8-4.4)        | 0.308   | 74 (65-89)   | 0.030   | 15.4 (12.3-21.5) | 0.018   |
|                                  | NR    | 4.2 (3.9-4.5)        |         | 85 (73-109)  |         | 20.5 (15.7-22.9) |         |
| On TCZ administration            | CR    | 4.3 (4.0-4.7)        | 0.757   | 69 (61-81)   | 0.068   | 16.3 (13.2-21.8) | 0.003   |
|                                  | NR    | 4.4 (4.0-4.7)        |         | 76 (68-91)   |         | 22.7 (15.3-25.2) |         |
| On 2 <sup>nd</sup> day after TCZ | CR    | 4.5 (4.2-4.8)        | 0.508   | 67 (61-76)   | 0.056   | 17.0 (13.8-21.8) | 0.005   |
|                                  | NR    | 4.4 (4.2-4.7)        |         | 72 (64-85)   |         | 23.8 (15.1-31.8) |         |
| On 5 <sup>th</sup> day after TCZ | CR    | 4.6 (4.2-4.8)        | 0.443   | 68 (62-79)   | 0.005   | 16.0 (13.7-20.8) | <0.001  |
|                                  | NR    | 4.5 (4.0-4.9)        |         | 80 (64-108)  |         | 25.5 (18.7-34.6) |         |
| Last recorded                    | CR    | 4.5 (4.2-4.8)        | 0.267   | 70 (62-83)   | <0.001  | 15.7 (12.3-19.5) | <0.001  |
|                                  | NR    | 4.6 (4.2-5.1)        |         | 99 (72-160)  |         | 35.1 (18-61.3)   |         |

| Parameter /time                  | Group | Glucose (mmol/L) | P value | hs-TnI (ng/L) | P value | Total bilirubin (μmol/L) | P value |
|----------------------------------|-------|------------------|---------|---------------|---------|--------------------------|---------|
| Baseline                         | CR    | 5.9 (5.2-7.3)    | 0.052   | 4 (4-8)       | <0.001  | 8.4 (6.7-11.4)           | 0.641   |
|                                  | NR    | 6.7 (5.9-8.1)    |         | 11 (5-24)     |         | 7.8 (6.5-11.2)           |         |
| On TCZ administration            | CR    | -                | -       | 3 (3-6)       | <0.001  | 8.9 (6.0-11.0)           | 0.433   |
|                                  | NR    | -                |         | 11 (4-31)     |         | 8.0 (6.4-9.6)            |         |
| On 2 <sup>nd</sup> day after TCZ | CR    | -                | -       | -             | -       | 8.9 (6.1-11.5)           | 0.435   |
|                                  | NR    | -                |         | -             |         | 8.3 (7.1-9.3)            |         |
| On 5 <sup>th</sup> day after TCZ | CR    | -                | -       | 3 (3-4)       | <0.001  | 10.9 (8.3-13.0)          | 0.789   |
|                                  | NR    | -                |         | 18 (4-101)    |         | 11.2 (8.0-13.1)          |         |
| Last recorded                    | CR    | -                | -       | 3 (3-4)       | <0.001  | 10.4 (8.8-13.7)          | 0.508   |
|                                  | NR    | -                |         | 15 (4-201)    |         | 11.6 (9.3-14.5)          |         |

| Parameter /time                  | Group | AST (IU/L)  | P value | ALT (IU/L)  | P value | ALP (IU/L)  | P value |
|----------------------------------|-------|-------------|---------|-------------|---------|-------------|---------|
| Baseline                         | CR    | 42 (31-59)  | 0.038   | 38 (27-54)  | 0.171   | -           | -       |
|                                  | NR    | 52 (35-76)  |         | 32 (19-50)  |         | -           |         |
| On TCZ administration            | CR    | 42 (32-59)  | 0.085   | 43 (29-67)  | 0.243   | 61 (48-72)  | 0.071   |
|                                  | NR    | 47 (38-78)  |         | 35 (24-62)  |         | 71 (50-81)  |         |
| On 2 <sup>nd</sup> day after TCZ | CR    | 41 (31-57)  | 0.166   | 58 (37-85)  | 0.039   | -           | -       |
|                                  | NR    | 46 (36-70)  |         | 44 (26-65)  |         | -           |         |
| On 5 <sup>th</sup> day after TCZ | CR    | 41 (27-66)  | 0.359   | 73 (50-125) | 0.039   | 61 (47-68)  | <0.001  |
|                                  | NR    | 47 (28-100) |         | 52 (35-98)  |         | 86 (64-93)  |         |
| Last recorded                    | CR    | 35 (26-52)  | 0.051   | 89 (48-128) | 0.139   | 60 (54-65)  | <0.001  |
|                                  | NR    | 44 (27-126) |         | 63 (38-106) |         | 88 (59-108) |         |

| Parameter /time                  | Group | GGT (IU/L)  | P value | INR              | P value | aPTT (s)         | P value |
|----------------------------------|-------|-------------|---------|------------------|---------|------------------|---------|
| Baseline                         | CR    | -           | -       | 1.16 (1.09-1.24) | 0.981   | 32.8 (29.3-37.1) | 0.525   |
|                                  | NR    | -           |         | 1.16 (1.10-1.22) |         | 33.4 (30.3-36.4) |         |
| On TCZ administration            | CR    | 76 (36-138) | 0.596   | 1.15 (1.08-1.30) | 0.519   | 32.6 (28.8-36.2) | 0.017   |
|                                  | NR    | 58 (36-113) |         | 1.15 (1.08-1.25) |         | 28.1 (25.5-30.8) |         |
| On 2 <sup>nd</sup> day after TCZ | CR    | -           | -       | -                | -       | -                | -       |
|                                  | NR    | -           |         | -                |         | -                |         |
| On 5 <sup>th</sup> day after TCZ | CR    | 81 (38-162) | 0.999   | 1.10 (1.04-1.19) | 0.058   | 28.1 (25.5-30.8) | 0.921   |
|                                  | NR    | 90 (40-148) |         | 1.13 (1.09-1.24) |         | 28.4 (24.7-31.1) |         |
| Last recorded                    | CR    | 90 (53-131) | 0.896   | 1.11 (1.04-1.48) | 0.672   | 27.5 (24.8-30.5) | 0.208   |
|                                  | NR    | 85 (44-137) |         | 1.17 (1.08-1.31) |         | 28.6 (24.8-33.7) |         |

| Parameter /time                  | Group | D-Dimer (µg/mL) | P value | TSH (µIU/L)      | P value | 25(OH)D <sub>3</sub> (ng/mL) | P value |
|----------------------------------|-------|-----------------|---------|------------------|---------|------------------------------|---------|
| Baseline                         | CR    | 0.8 (0.6-1.4)   | 0.552   | 0.91 (0.60-1.20) | 0.104   | 27 (17-34)                   | 0.013   |
|                                  | NR    | 0.9 (0.6-1.3)   |         | 0.62 (0.32-1.11) |         | 24 (13-28)                   |         |
| On TCZ administration            | CR    | 0.9 (0.6-1.5)   | 0.005   | -                | -       | -                            | -       |
|                                  | NR    | 1.7 (0.7-3.7)   |         | -                |         | -                            |         |
| On 2 <sup>nd</sup> day after TCZ | CR    | 1.1 (0.7-1.8)   | <0.001  | -                | -       | -                            | -       |
|                                  | NR    | 6.1 (1.4-27.4)  |         | -                |         | -                            |         |
| On 5 <sup>th</sup> day after TCZ | CR    | 1.2 (0.6-1.7)   | <0.001  | -                | -       | -                            | -       |
|                                  | NR    | 6.5 (1.7-20.1)  |         | -                |         | -                            |         |
| Last recorded                    | CR    | 0.7 (0.4-1.4)   | <0.001  | -                | -       | -                            | -       |
|                                  | NR    | 2.2 (1.5-4.8)   |         | -                |         | 8-                           |         |

| Parameter /time                  | Group | TP (g/L)   | P value | albumin (g/L) | P value | ferritin (ng/mL) | P value |
|----------------------------------|-------|------------|---------|---------------|---------|------------------|---------|
| Baseline                         | CR    | -          | -       | -             | -       | -                | -       |
|                                  | NR    | -          | -       | -             | -       | -                | -       |
| On TCZ administration            | CR    | 63 (60-66) | 0.518   | 36 (34-38)    | 0.335   | 1144 (697-1527)  | 0.849   |
|                                  | NR    | 62 (59-66) |         | 36 (33-37)    |         | 1075(646-1737)   |         |
| On 2 <sup>nd</sup> day after TCZ | CR    | -          | -       | -             | -       | -                | -       |
|                                  | NR    | -          | -       | -             | -       | -                | -       |
| On 5 <sup>th</sup> day after TCZ | CR    | 63 (59-66) | 0.029   | 37 (34-40)    | <0.001  | 1156 (633-1789)  | 0.012   |
|                                  | NR    | 59 (56-63) |         | 33 (30-37)    |         | 800 (508-1106)   |         |
| Last recorded                    | CR    | -          | -       | -             | -       | 590 (439-706)    | <0.001  |
|                                  | NR    | -          | -       | -             | -       | 1291 (784-1719)  | <0.001  |

| Parameter /time                  | Group | LDH (IU/L)    | P value | Chloride (mmol/L) | P value | CK (IU/L)    | P value |
|----------------------------------|-------|---------------|---------|-------------------|---------|--------------|---------|
| Baseline                         | CR    | 405 (326-485) | <0.001  | -                 | -       | -            | -       |
|                                  | NR    | 510 (417-695) |         | -                 | -       | -            | -       |
| On TCZ administration            | CR    | 408 (355-478) | <0.001  | 102 (100-104)     | 0.175   | 104 (56-188) | 0.031   |
|                                  | NR    | 646 (463-802) |         | 104 (100-105)     |         | 167 (79-371) |         |
| On 2 <sup>nd</sup> day after TCZ | CR    | 374 (312-444) | <0.001  | -                 | -       | -            | -       |
|                                  | NR    | 610 (486-871) |         | -                 | -       | -            | -       |
| On 5 <sup>th</sup> day after TCZ | CR    | 332 (272-408) | <0.001  | 103 (102-106)     | 0.858   | 41.5 (27-61) | <0.001  |
|                                  | NR    | 743 (477-961) |         | 104 (102-105)     |         | 100 (47-194) |         |
| Last recorded                    | CR    | 258 (229-333) | <0.001  | -                 | -       | -            | -       |
|                                  | NR    | 715 (323-977) |         | -                 | -       | 8-           | -       |

| Parameter<br>/time               | Group | BNP (ng/L)  | P value | PCT (ng/mL)      | P value  |
|----------------------------------|-------|-------------|---------|------------------|----------|
| Baseline                         | CR    | -           | -       | 0.08 (0.05-0.15) | 0.645    |
|                                  | NR    | -           | -       | 0.08 (0.05-0.18) |          |
| On TCZ administration            | CR    | 32 (16-55)  | 0.003   | 0.07 (0.05-0.14) | 0.464    |
|                                  | NR    | 61 (38-103) |         | 0.09 (0.04-0.24) |          |
| On 2 <sup>nd</sup> day after TCZ | CR    | -           | -       | 0.04 (0.03-0.08) | 0.418    |
|                                  | NR    | -           | -       | 0.05 (0.03-0.10) |          |
| On 5 <sup>th</sup> day after TCZ | CR    | 19 (8-40)   | 0<0.001 | 0.03 (0.02-0.04) | ,0.015   |
|                                  | NR    | 86 (36-134) |         | 0.04 (0.02-0.14) |          |
| Last recorded                    | CR    | -           | -       | 0.02 (0.02-0.02) | <0.001,- |
|                                  | NR    | -           | -       | 0.30 (0.02-1.38) |          |

PaO<sub>2</sub> – partial pressure of arterial oxygen, FiO<sub>2</sub> – fraction of inspired oxygen, Hgb – hemoglobin, RBC – red blood cell count, Hct – hematocrit, WBC – white blood cell count, NLR – neutrocyte-to-lymphocyte ratio, NMR – neutrocyte-to-monocyte ratio, PLT – platelet count, INC – immature neutrocyte count, CRP – C-reactive protein concentration, SCr – serum creatinine concentration, BUN – blood urea nitrogen, hs-TnI – high sensitive troponin I, AST – aspartate aminotransferase, ALT – alanine aminotransferase, ALP – alkaline phosphatase, GGT – gamma-glutamyl transferase, INR – international normalized ratio, aPTT – activated partial thromboplastin time, TSH – thyrotropin, 25(OH)D<sub>3</sub> – calcifediol, TP – total protein, LDH – lactate dehydrogenase, CK – creatine kinase, BNP – B-type natriuretic peptide, PCT – procalcitonin
