# Supplementary material for: Identification of Clinical Response Predictors of Tocilizumab Treatment in Patients with Severe COVID-19 Based on Single-Center Experience
Source: MDPI journal article supplement (doi:10.3390/jcm12062429), 2023-03-22
Supplement: s1 [file s1]

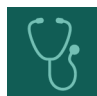**Supplementary Table S5.** Outcomes and their prevalence upon administration and occurrence after treatment with tocilizumab in studied groups.

| Outcome                               | Prevalence upon administration |                |                     | Occurrence after administration |                |                     |
|---------------------------------------|--------------------------------|----------------|---------------------|---------------------------------|----------------|---------------------|
|                                       | Clinical responders            | Non-responders | <i>P</i> value      | Clinical responders             | Non-responders | <i>P</i> value      |
| death*                                | -                              | -              | -                   | -                               | 20 (58.8%)     | <0.001 <sup>a</sup> |
| ICU transfer due to ARDS progression* | -                              | -              | -                   | -                               | 20 (58.8%)     | <0.001 <sup>a</sup> |
| PE                                    | 2 (2.3%)                       | 2 (5.9%)       | 0.317 <sup>b</sup>  | 1 (1.2%)                        | 3 (8.8%)       | 0.068 <sup>b</sup>  |
| DVT                                   | -                              | -              | -                   | 2 (2.3%)                        | -              | 0.511 <sup>*</sup>  |
| CAC*                                  | -                              | 2 (5.9%)       | 0.078 <sup>b</sup>  | 31 (36.1%)                      | 22 (64.7%)     | 0.004 <sup>a</sup>  |
| DIC                                   | -                              | -              | -                   | -                               | 1 (2.9%)       | 0.283 <sup>b</sup>  |
| severe lymphopenia                    | 28 (32.6%)                     | 13 (38.2%)     | 0.554 <sup>a</sup>  | 21 (24.4%)                      | 11 (32.4%)     | 0.376 <sup>a</sup>  |
| haemolytic anemia                     | -                              | -              | -                   | 1 (1.2%)                        | 3 (8.8%)       | 0.068 <sup>b</sup>  |
| neutropenia                           | 15 (17.4%)                     | 3 (8.8%)       | 0.233 <sup>a</sup>  | 13 (15.1%)                      | 2 (5.9%)       | 0.140 <sup>b</sup>  |
| agranulocytosis                       | -                              | -              | -                   | 10 (11.6%)                      | 2 (5.9%)       | 0.282 <sup>b</sup>  |
| thrombocytopenia                      | 29 (33.7%)                     | 9 (26.5%)      | 0.441 <sup>a</sup>  | 10 (11.6%)                      | 9 (26.5%)      | 0.045 <sup>a</sup>  |
| severe thrombocytopenia               | -                              | -              | -                   | 6 (7.0%)                        | 5 (14.7%)      | 0.165 <sup>b</sup>  |
| major bleeding                        | -                              | -              | -                   | -                               | 1 (2.9%)       | 0.283 <sup>b</sup>  |
| minor bleeding                        | -                              | -              | -                   | 3 (3.5%)                        | 6 (17.7%)      | 0.015 <sup>b</sup>  |
| MACE                                  | 8 (9.3%)                       | 11 (32.4%)     | 0.001 <sup>a</sup>  | 3 (3.5%)                        | 9 (26.5%)      | <0.001 <sup>b</sup> |
| AMI                                   | 7 (8.1%)                       | 11 (32.4%)     | <0.001 <sup>a</sup> | 2 (2.3%)                        | 8 (23.5%)      | <0.001 <sup>b</sup> |
| ACS                                   | -                              | -              | -                   | -                               | 1 (2.9%)       | 0.283 <sup>b</sup>  |
| myocarditis                           | 1 (1.2%)                       | -              | 0.716 <sup>b</sup>  | -                               | -              | -                   |
| new onset of AF                       | 1 (1.2%)                       | -              | 0.716 <sup>b</sup>  | 1 (1.2%)                        | -              | 0.716 <sup>b</sup>  |
| HF decompensation                     | 1 (1.2%)                       | -              | 0.716 <sup>b</sup>  | 1 (1.2%)                        | -              | 0.716 <sup>b</sup>  |
| liver injury                          | 28 (32.6%)                     | 9 (26.5%)      | 0.515 <sup>a</sup>  | 18 (20.9%)                      | 15 (44.1%)     | 0.010 <sup>a</sup>  |
| cholestatic                           | 27 (31.4%)                     | 7 (20.6%)      | 0.236 <sup>a</sup>  | 8 (9.3%)                        | 5 (14.7%)      | 0.289 <sup>b</sup>  |
| hepatocellular                        | 1 (1.2%)                       | 2 (5.9%)       | 0.193 <sup>b</sup>  | 5 (5.8%)                        | 5 (14.7%)      | 0.113 <sup>b</sup>  |
| mixed                                 | 5 (5.8%)                       | 3 (8.8%)       | 0.406 <sup>b</sup>  | 11 (12.8%)                      | 5 (14.7%)      | 0.494 <sup>b</sup>  |
| DILI                                  | -                              | -              | -                   | 1 (1.2%)                        | -              | 0.716 <sup>b</sup>  |
| SLD                                   | -                              | -              | -                   | -                               | 6 (17.7%)      | <0.001 <sup>b</sup> |
| patients with secondary infections    | 2 (2.3%)                       | 4 (11.8%)      | 0.033 <sup>a</sup>  | 6 (7.0%)                        | 10 (29.4%)     | 0.002 <sup>b</sup>  |
| UTI                                   | 1 (1.2%)                       | 1 (2.9%)       | 0.488 <sup>b</sup>  | 4 (4.7%)                        | 6 (17.7%)      | 0.029 <sup>b</sup>  |
| VAP ( <i>A. baumannii</i> )           | -                              | -              | -                   | -                               | 6 (17.7%)      | <0.001 <sup>b</sup> |

|                                          |            |            |                     |            |            |                     |
|------------------------------------------|------------|------------|---------------------|------------|------------|---------------------|
| bacteraemia                              | -          | -          | -                   | 2 (2.3%)   | 8 (23.5%)  | <0.001 <sup>b</sup> |
| sepsis                                   | -          | -          | -                   | -          | 8 (23.5%)  | <0.001 <sup>b</sup> |
| septic shock                             | -          | -          | -                   | -          | 5 (14.7%)  | 0.001 <sup>b</sup>  |
| sinusitis                                | -          | 2 (5.9%)   | 0.078 <sup>b</sup>  | -          | -          | -                   |
| otitis media                             | 1 (1.2%)   | 1 (1.2%)   | 0.488 <sup>b</sup>  | -          | -          | -                   |
| candidiasis                              | -          | -          | -                   | -          | 2 (5.9%)   | 0.078 <sup>b</sup>  |
| <i>S. pneumoniae</i><br>pneumonia        | -          | -          | -                   | 5 (5.8%)   | 3 (8.8%)   | 0.406 <sup>b</sup>  |
| <i>L. pneumonophila</i><br>pneumonia     | -          | -          | -                   | -          | 2 (5.9%)   | 0.078 <sup>b</sup>  |
| AKI                                      | -          | -          | -                   | 6 (7.0%)   | 17 (50%)   | <0.001 <sup>a</sup> |
| prerenal                                 | -          | -          | -                   | 5 (5.8%)   | 11 (32.4%) | <0.001 <sup>b</sup> |
| renal                                    | -          | -          | -                   | 1 (1.2%)   | 6 (17.7%)  | <0.001 <sup>b</sup> |
| AKI demanding RRT                        | -          | -          | -                   | -          | 13 (38.2%) | <0.001 <sup>b</sup> |
| acute<br>tubulointerstitial<br>nephritis | 6 (7.0%)   | -          | 0.182 <sup>b</sup>  | 4 (4.7%)   | 2 (5.9%)   | 0.547 <sup>b</sup>  |
| proteinuria                              | 40 (46.5%) | 15 (44.1%) | 0.812 <sup>a</sup>  | 2 (2.3%)   | 9 (26.5%)  | <0.001 <sup>b</sup> |
| sterile pyuria                           | 34 (39.5%) | 20 (58.8%) | 0.056 <sup>a</sup>  | 5 (5.8%)   | 9 (26.5%)  | 0.003 <sup>b</sup>  |
| acute confusional<br>state               | 1 (1.2%)   | 2 (5.9%)   | 0.193 <sup>b</sup>  | -          | -          | -                   |
| COVID-19<br>encephalopathy               | -          | -          | -                   | -          | 2 (5.9%)   | 0.078 <sup>b</sup>  |
| hypotension                              | -          | 1 (2.9%)   | 0.283 <sup>b</sup>  | 9 (10.5%)  | 2 (5.9%)   | 0.726 <sup>b</sup>  |
| haemodynamic<br>instability              | -          | -          | -                   | 6 (7.0%)   | 3 (8.8%)   | 0.711 <sup>b</sup>  |
| respiratory<br>deterioration             | -          | -          | -                   | 13 (15.1%) | 26 (76.5%) | <0.001 <sup>a</sup> |
| COV-HI                                   | 50 (58.1%) | 23 (67.7%) | 0.336 <sup>a</sup>  | 8 (9.3%)   | 14 (41.2%) | <0.001 <sup>a</sup> |
| cHIS                                     | 65 (75.6%) | 30 (88.3%) | 0.124 <sup>a</sup>  | 4 (4.7%)   | 3 (8.8%)   | 0.313 <sup>b</sup>  |
| CCS                                      | 10 (11.6%) | 13 (38.2%) | <0.001 <sup>a</sup> | 4 (4.7%)   | 3 (8.8%)   | 0.313 <sup>b</sup>  |

\*P<0.05 - <sup>a</sup>  $\chi^2$  test or <sup>b</sup> Fisher's exact test.

ICU – intensive care unit, PE – pulmonary embolism, DVT – deep vein thrombosis, CAC – COVID-19 associated coagulopathy, DIC – disseminated intravascular coagulation, MACE – major adverse cardiovascular event, AMI – acute myocardial injury, ACS – acute coronary syndrome, AF – atrial fibrillation, HF – heart failure, DILI – drug-induced liver injury, SLD – severe liver dysfunction, UTI – urinary tract infection, VAP – ventilator-associated pneumonia, AKI – acute kidney injury, RRT – renal replacement therapy, COV-HI – COVID-19 hyperinflammation syndrome, cHIS - COVID-19-associated Hyperinflammation Syndrome score, CCS - COVID-19 cytokine storm.
